# Supplementary material for: Development of Single Nucleotide Polymorphism and Association Analysis with Growth Traits for Black Porgy (Acanthopagrus schlegelii)
Source: MDPI journal article supplement (doi:10.3390/genes13111992), 2022-10-31
Supplement: s1 [file s1]

## Supplementary Tables

**Table S1.** Primer information of 61 candidate SNPs of black porgy.

| SNP                | Mutated Base | Primer                                                                                                            |
|--------------------|--------------|-------------------------------------------------------------------------------------------------------------------|
| scaffold2-2815335  | T→G          | F: ACGTTGGATGTGAACCCCACTGTGATTAGG<br>R: ACGTTGGATGTGAACCCCACTGTGATTAGG<br>Extension: ACAGCTGAGAGAGCCCT            |
| scaffold2-3426830  | T→C          | F: ACGTTGGATGCACTCACACTGCTTGTAAC<br>R: ACGTTGGATGCCTGCAGTTGTCAAAACCAC<br>Extension: ACACGGCTTGTAACATCGTTGAC       |
| scaffold2-13687576 | A→T          | F: ACGTTGGATGATGCTGTTGCCATTACAGCC<br>R: ACGTTGGATGAAGTTGTCCCCAGGTTGATG<br>Extension: CAGCCTATTGCCTTTCAGT          |
| scaffold3-16652593 | T→C          | F: ACGTTGGATGAACTGTTAAAGGCACAGCCG<br>R: ACGTTGGATGATACCATCACCGATGGACAG<br>Extension: GGATAAGATCCTGGGAGCTGACAC     |
| scaffold3-16653046 | C→T          | F: ACGTTGGATGATTGTAGATGTGCCTGTCCG<br>R: ACGTTGGATGTGTACCTTCCATCAATAGC<br>Extension: CGAAGAGCTTCTGGGCCGCGT         |
| scaffold4-10430350 | A→G          | F: ACGTTGGATGGGTAAAAGGTAAACATGCTCC<br>R: ACGTTGGATGACACCATTTGTTGAGGCAAGG<br>Extension: AACTTTTGTTATTTTTCAGACAAATG |
| scaffold5-12042944 | T→C          | F: ACGTTGGATGGGACCTCTTAAACTGACACG<br>R: ACGTTGGATGACTGCACACAGGACAGATAC<br>Extension: TCCACGCTTTGCGCTCCGC          |
| scaffold6-5210078  | A→C          | F: ACGTTGGATGTGCTTGATTTCCGACATGCC<br>R: ACGTTGGATGAGAGCCCCATGATGTACCC<br>Extension: GGGAGCAACTGGCGGGACAGGGC       |
| scaffold6-9258715  | T→C          | F: ACGTTGGATGAGGTGATGATGTGCAGACAG<br>R: ACGTTGGATGCAACTCCATGTTCCGACATCC<br>Extension: CCGAAGCTGTCTCTTGTACTC       |
| scaffold6-15802194 | C→T          | F: ACGTTGGATGCACCATGAATGGAGAAGCTG<br>R: ACGTTGGATGTCTCCTCTTGTTGTTACGG<br>Extension: TTATCCCACACACCGGCCTC          |
| scaffold7-15455173 | A→G          | F: ACGTTGGATGTGTTTCAGACGTGCAAGCTC<br>R: ACGTTGGATGAAAAGCCTCCGGAGCAAATG<br>Extension: TGCCTCTTCTCTGCTCTCATCTT      |
| scaffold7-15455275 | C→T          | F: ACGTTGGATGGAAACAAGCTCTGAGTCTGG<br>R: ACGTTGGATGTTGATCTTGTGAGCTGGCAC<br>Extension: GAAGTGAAGCCATCATGACTGA       |
| scaffold7-20336421 | T→C          | F: ACGTTGGATGTACCTATAGTTGGACACCGC<br>R: ACGTTGGATGTCCCGTGCTTCAGCTATGAG<br>Extension: TTGACGCACTGTCCCTT            |
| scaffold8-9389475  | T→C          | F: ACGTTGGATGTTTTTCAGCACGTCGCGAAG<br>R: ACGTTGGATGTCAGAGGTCTCCCTTCATTG<br>Extension: AGGCTCGAAGCCTCTTCTTCTC       |
| scaffold8-12482471 | T→C          | F: ACGTTGGATGACTTACTTGACAGGCCGCTG<br>R: ACGTTGGATGTTCTCCAGATTCTGGAGAG<br>Extension: AGATGTCCTTGGTCATGGTGCC        |

|                     |     |                                                                                                                  |
|---------------------|-----|------------------------------------------------------------------------------------------------------------------|
| scaffold9-8466307   | T→C | F: ACGTTGGATGCCTCGTAAGCAGGATTCCAG<br>R: ACGTTGGATGTCTGTAGATGGACCAGTAGC<br>Extension: TGAGTCCAGCGCCCTCTATCAATGC   |
| scaffold9-8467739   | G→A | F: ACGTTGGATGATTGAGTTCCAGGGATCCTC<br>R: ACGTTGGATGACAGGAAGCTTCGCAGTATG<br>Extension: TCCTGTTACTAAACCACAGTCAATCAT |
| scaffold10-3011393  | T→C | F: ACGTTGGATGAGACCAAACAGCTGACGGAG<br>R: ACGTTGGATGGAACGTGTTCCGCCAGTTTGC<br>Extension: GGACCAGCTGACGGAGATGCTTCC   |
| scaffold11-8650275  | A→G | F: ACGTTGGATGTTGATGCGACTGACAGAGAC<br>R: ACGTTGGATGGTTCTCGTCTTTGGTCTCAG<br>Extension: AAATGCGGGCCTTCGCGGA         |
| scaffold12-12226863 | A→G | F: ACGTTGGATGTTCTTCTGCTGCTGGTCCTC<br>R: ACGTTGGATGAGTGTCTGCTGCACCCTGA<br>Extension: AGGGTGCGGTGCTGCTGCCGGCG      |
| scaffold12-12716321 | T→C | F: ACGTTGGATGTCGTGGAGCTCATAGAGAAG<br>R: ACGTTGGATGTCTCCGCTTGTTGACTGTG<br>Extension: AGAAGAACTTGGACACGTC          |
| scaffold12-12772854 | A→G | F: ACGTTGGATGTTGGCATCAACCTGGACAAC<br>R: ACGTTGGATGACTCCTTCTCAAAGGCATGG<br>Extension: CAGCCCTATAAGATGCC           |
| scaffold13-4787950  | A→C | F: ACGTTGGATGTACCCTTTGGAACCACAAGC<br>R: ACGTTGGATGTTTGTACCCCATCCTTCCAC<br>Extension: CACAAGCCCATTATCTC           |
| scaffold13-4805623  | G→A | F: ACGTTGGATGGTTGCTTTCTGCTTTGCTCC<br>R: ACGTTGGATGGAAGTCTGTGACAGACTTGG<br>Extension: CTGCTTTGCTCCAGCTTT          |
| scaffold13-5790209  | T→C | F: ACGTTGGATGACTCGTGAACGATGAGTGAC<br>R: ACGTTGGATGGCTACATGCTGGACAACCTAC<br>Extension: AGGGACCCCCAGGTGGCAATCTG    |
| scaffold13-6616349  | C→T | F: ACGTTGGATGTCATCCTGAGACCGGAGAAG<br>R: ACGTTGGATGTGTGCGACTAGTCTGAGGAAG<br>Extension: GGGTCATCTGGATCAAACCTGGA    |
| scaffold16-5142266  | T→C | F: ACGTTGGATGAGAACCATTGCAGCCAGATG<br>R: ACGTTGGATGGAAGTCTTGCTGGTTTCTCC<br>Extension: AGGTGAGCCCCAGCAGAGTG        |
| scaffold16-5142293  | A→G | F: ACGTTGGATGTAGGCCTCACCTTTGATCTG<br>R: ACGTTGGATGTACCTGTGTGGTCACTCTGC<br>Extension: GGTTCACTGGAGAGAACCAT        |
| scaffold17-796332   | T→C | F: ACGTTGGATGCCTAGAGCCAGGATCTTATC<br>R: ACGTTGGATGCCCTGGAGTTCCACAAAGAA<br>Extension: CCTCATAACCATCAAAAATAAGGTC   |
| scaffold17-796939   | T→C | F: ACGTTGGATGACAGAGCGTAGTGTATAACC<br>R: ACGTTGGATGCTATGACAACACAACAGTGC<br>Extension: CCCCTGTGTGTCAGCTTCCT        |
| scaffold18-2467783  | T→C | F: ACGTTGGATGACACTCCTGCCTGTGTGGTC<br>R: ACGTTGGATGACTTGACACACTCCATGAG<br>Extension: CCTGTCCGGAAACCAGGC           |
| scaffold19-709400   | T→C | F: ACGTTGGATGACAATATCACTGGGTGGCTG<br>R: ACGTTGGATGGGCCAACAGCTTGTTTGAAG<br>Extension: TGGTGGCTGGACAAGAACAA        |
| scaffold20-453978   | G→A | F: ACGTTGGATGGTCCCTCAATACAGGCTATG                                                                                |

|                     |     |                                                                                                                                                                                            |
|---------------------|-----|--------------------------------------------------------------------------------------------------------------------------------------------------------------------------------------------|
| scaffold21-4955509  | A→G | R: ACGTTGGATGCACATGTCGATACTTGTCTG<br>Extension: TATTTGATCGTTTGCTGACCATC<br>F: ACGTTGGATGAACGTCAGGACGAGCCTGTG<br>R: ACGTTGGATGATCCCCTCAGAGTCTTTTGC<br>Extension: GGTGCAGGACGAGCCTGTGAGAGTGG |
| scaffold25-4206172  | A→G | F: ACGTTGGATGGTGTCCAGAACCTTCTGACC<br>R: ACGTTGGATGCTTCAGGTGAAAACACGGTC<br>Extension: ACACCAGACCCTCTGTGCC                                                                                   |
| scaffold31-9275712  | T→C | F: ACGTTGGATGCTTCCCCCGCATCACTTTAC<br>R: ACGTTGGATGTCAGAGAGATGAGGTGTGTG<br>Extension: GGTCACGCATCACTTTACCTCAGAA                                                                             |
| scaffold31-11182212 | A→G | F: ACGTTGGATGGTGTCTTGTGCTCACCTTTG<br>R: ACGTTGGATGCCCAAGCTCAGACCTTGAAA<br>Extension: GCTCACCTTTGTCTTTCTT                                                                                   |
| scaffold31-12525471 | A→C | F: ACGTTGGATGTGTTGACAGCGTCTGCAATG<br>R: ACGTTGGATGGGCCAATCGTAACATTACAGC<br>Extension: TCCCGGTACTCGTCGGGATTCT                                                                               |
| scaffold34-3226435  | A→C | F: ACGTTGGATGCTGACGACATGGAGATGAAG<br>R: ACGTTGGATGGTGTGACATTTACCTCTCC<br>Extension: CCCTGAGTATTCTGTGCACCCG                                                                                 |
| scaffold35-2164468  | A→G | F: ACGTTGGATGAAACTCACCTGCAGTTTGGC<br>R: ACGTTGGATGGTTGATTCTGTGTTGTGTGC<br>Extension: GATATCAGCCAGCTCTTT                                                                                    |
| scaffold36-4436178  | T→C | F: ACGTTGGATGCTGAGGACCATACAGCCATC<br>R: ACGTTGGATGCTCTGTTCTGTCCTTAGTCG<br>Extension: GCCTTGCAGCACATGGTACTCCGC                                                                              |
| scaffold49-4261152  | G→A | F: ACGTTGGATGTCTCACCACACATGACGTTG<br>R: ACGTTGGATGACCATATTCATGGGTCACGG<br>Extension: ATGACGTTGTATAATTCTATATTTTC                                                                            |
| scaffold59-960994   | A→G | F: ACGTTGGATGAGCTGGTGGATCGACCTGTG<br>R: ACGTTGGATGGGTTTAAACCTACGCCAGAG<br>Extension: AGCTTGTGGATCGACCTGTGGGACCC                                                                            |
| scaffold65-275780   | A→G | F: ACGTTGGATGTCAGAGCCCTGATGAGGAAG<br>R: ACGTTGGATGGTGTCTTACTTCAGCTCCTG<br>Extension: AACAGGACAGAGTTGAGCAGAT                                                                                |
| scaffold66-172323   | A→G | F: ACGTTGGATGGAGGCTGGTTTCTTTGTACG<br>R: ACGTTGGATGTGTTTCATCACCTCTCTCAC<br>Extension: GGTGAGGTATACAATCCAGTC                                                                                 |
| scaffold69-513313   | C→T | F: ACGTTGGATGACTGTGAGTGCTACATGTC<br>R: ACGTTGGATGGAGAAAGAGAGAGATGCAGG<br>Extension: TTCATCCTCTTCATGCT                                                                                      |
| scaffold85-1906881  | A→G | F: ACGTTGGATGTGTATTTGCAGAGACCAGCG<br>R: ACGTTGGATGCTGAGGACCACATGAAGAAG<br>Extension: TGCGTAGAAAGGCATGTC                                                                                    |
| scaffold91-1266067  | A→G | F: ACGTTGGATGAGTCTGACACTCTGCAACTG<br>R: ACGTTGGATGCTTTGCTTTCTCAGGTTTC<br>Extension: GATCCATGTTCTCTCACCAAG                                                                                  |
| scaffold102-1219145 | T→C | F: ACGTTGGATGAATCCTGCGCCTGAGAAGAC<br>R: ACGTTGGATGTTCTGCTCAGATTGGGACG<br>Extension: CCATCCCGCTCGGGCATCGCTGCCTCC                                                                            |
| scaffold102-1223941 | T→C | F: ACGTTGGATGCCAGATTAAAGCTGTGGTCC<br>R: ACGTTGGATGAAAGTGGCTGTGTAGCGTTG                                                                                                                     |

|                    |     |                                                                                                                 |
|--------------------|-----|-----------------------------------------------------------------------------------------------------------------|
| scaffold111-391534 | T→C | Extension: AAGCTGTGGTCCATAACTA<br>F: ACGTTGGATGAAGGAAAACTGCAGCCGAG<br>R: ACGTTGGATGCTTACTTTGTGAGGCAGCAG         |
| scaffold141-357706 | T→C | Extension: TCGTAAAGAGCTGGAGGC<br>F: ACGTTGGATGTGATGCGTGACTGCAGTTTC<br>R: ACGTTGGATGCAGGCCTGGCATCAAGATCA         |
| scaffold155-255306 | T→C | Extension: CTGCTCTTGTCTACAGGAGG<br>F: ACGTTGGATGTGTAACCTCAGGTGGGTCAG<br>R: ACGTTGGATGTGGAGAAGATGGGTTTGCAC       |
| scaffold164-155638 | G→T | Extension: ATATCGAGGTGCGGCCTGGTAT<br>F: ACGTTGGATGACAAGCTGCTAGTAGGCAAC<br>R: ACGTTGGATGATGTCGTCTTACCTTCGCTG     |
| scaffold168-178120 | A→G | Extension: CTCACAACGAAGAAGGT<br>F: ACGTTGGATGTGACTAACAGAAGACCGACC<br>R: ACGTTGGATGAAGCGTTTCTTCACCGTCAC          |
| scaffold184-113778 | C→T | Extension: AACAAACCGGCTCGCTTCTCCCC<br>F: ACGTTGGATGAAGAAGAACCCAGAGCAGTC<br>R: ACGTTGGATGGTCTGTTTGTCTCACCTTCC    |
| scaffold184-115262 | A→G | Extension: CCCATCAGTCGGTCAACTTCGC<br>F: ACGTTGGATGCCTTTAGGTGGGATGTAGTC<br>R: ACGTTGGATGCAGCTGGTGATAAGAAGTGC     |
| scaffold210-68511  | A→G | Extension: GGGATGTAGTCGCTCAT<br>F: ACGTTGGATGTTGTCCTGCAGACATTGCTC<br>R: ACGTTGGATGTCGACAACAGTAACGGTGAG          |
| scaffold290-11890  | T→C | Extension: GGCCGGAAGTTTCATCAGCTGCACCA<br>F: ACGTTGGATGCCTCTGCTGAACTATTACCC<br>R: ACGTTGGATGGTACATCTGGGAGTCTCTTC |
| scaffold305-32581  | A→G | Extension: ATGTGTGATTCAAGTAAGGA<br>F: ACGTTGGATGACACCTTCTACAACGAGCTG<br>R: ACGTTGGATGTCTTCTCCCTGTTGGCCTTG       |
| scaffold435-12868  | A→G | Extension: TACCACGAGCTGCGCGTGGCCCC<br>F: ACGTTGGATGCCAAATCTCAAGACCGTAGC<br>R: ACGTTGGATGACACATCCTTTGGGCTCATC    |
|                    |     | Extension: CCCGACTGGGAAAGACAT                                                                                   |

**Table S2.** Genetic polymorphisms of black porgy SNP markers in the population.

| SNP                 | Genotypes | Genotype Frequency | Allele Frequency | <i>Ne</i> | <i>He</i> | <i>PIC</i> | $\chi^2$ |
|---------------------|-----------|--------------------|------------------|-----------|-----------|------------|----------|
| scaffold10-3011393  | CC        | 0.867              | C: 0.927         | 1.156     | 0.135     | 0.131      | 1.879    |
|                     | CT        | 0.120              | T: 0.073         |           |           |            |          |
|                     | TT        | 0.013              |                  |           |           |            |          |
| scaffold10-3011393  | CC        | 0.392              | C: 0.592         | 1.935     | 0.483     | 0.533      | 4.824    |
|                     | CT        | 0.399              | T: 0.408         |           |           |            |          |
|                     | TT        | 0.209              |                  |           |           |            |          |
| scaffold102-1223941 | CC        | 0.943              | C: 0.946         | 1.113     | 0.102     | 0.100      | 138.966  |
|                     | CT        | 0.006              | T: 0.054         |           |           |            |          |
|                     | TT        | 0.051              |                  |           |           |            |          |
| scaffold111-8650275 | AA        | 0.032              | A: 0.177         | 1.412     | 0.292     | 0.926      | 0.0004   |
|                     | AG        | 0.291              | G: 0.823         |           |           |            |          |
|                     | GG        | 0.677              |                  |           |           |            |          |
| scaffold111-391534  | CC        | 0.759              | C: 0.858         | 1.323     | 0.244     | 0.235      | 6.114    |
|                     | CT        | 0.196              | T: 0.142         |           |           |            |          |

|                     |    |       |          |       |       |       |         |
|---------------------|----|-------|----------|-------|-------|-------|---------|
|                     | TT | 0.044 |          |       |       |       |         |
| scaffold12-12226863 | AG | 0.070 | A: 0.035 | 1.072 | 0.067 | 0.066 | 0.206   |
|                     | GG | 0.930 | G: 0.965 |       |       |       |         |
|                     | CC | 0.639 | C: 0.801 | 1.469 | 0.319 | 0.308 | 0.019   |
| scaffold12-12716321 | CT | 0.323 | T: 0.199 |       |       |       |         |
|                     | TT | 0.038 |          |       |       |       |         |
|                     | AA | 0.095 | A: 0.256 | 1.616 | 0.381 | 0.862 | 3.484   |
| scaffold12-12772854 | AG | 0.323 | G: 0.744 |       |       |       |         |
|                     | GG | 0.582 |          |       |       |       |         |
|                     | AA | 0.184 | A: 0.389 | 1.906 | 0.475 | 0.735 | 2.869   |
| scaffold13-4787950  | AC | 0.411 | C: 0.611 |       |       |       |         |
|                     | CC | 0.405 |          |       |       |       |         |
|                     | AA | 0.070 | A: 0.522 | 1.996 | 0.499 | 0.603 | 104.610 |
| scaffold13-4805623  | AG | 0.905 | G: 0.478 |       |       |       |         |
|                     | GG | 0.025 |          |       |       |       |         |
|                     | CC | 0.867 | C: 0.873 | 1.284 | 0.221 | 0.213 | 140.428 |
| scaffold13-5790209  | CT | 0.013 | T: 0.127 |       |       |       |         |
|                     | TT | 0.120 |          |       |       |       |         |
|                     | CC | 0.044 | C: 0.108 | 1.238 | 0.192 | 0.970 | 18.355  |
| scaffold13-6616349  | CT | 0.127 | T: 0.892 |       |       |       |         |
|                     | TT | 0.829 |          |       |       |       |         |
|                     | CC | 0.671 | C: 0.829 | 1.395 | 0.283 | 0.272 | 2.154   |
| scaffold141-357706  | CT | 0.316 | T: 0.171 |       |       |       |         |
|                     | TT | 0.013 |          |       |       |       |         |
|                     | CC | 0.367 | C: 0.585 | 1.943 | 0.485 | 0.539 | 1.590   |
| scaffold155-255306  | CT | 0.437 | T: 0.415 |       |       |       |         |
|                     | TT | 0.196 |          |       |       |       |         |
|                     | CC | 0.772 | C: 0.877 | 1.276 | 0.216 | 0.208 | 0.190   |
| scaffold16-5142266  | CT | 0.209 | T: 0.123 |       |       |       |         |
|                     | TT | 0.019 |          |       |       |       |         |
|                     | AA | 0.114 | A: 0.320 | 1.770 | 0.435 | 0.803 | 0.463   |
| scaffold16-5142293  | AG | 0.411 | G: 0.680 |       |       |       |         |
|                     | GG | 0.475 |          |       |       |       |         |
|                     | GG | 0.101 | G: 0.244 | 1.584 | 0.369 | 0.873 | 8.163   |
| scaffold164-155638  | TG | 0.285 | T: 0.756 |       |       |       |         |
|                     | TT | 0.614 |          |       |       |       |         |
|                     | AA | 0.177 | A: 0.418 | 1.947 | 0.486 | 0.707 | 0.020   |
| scaffold168-178120  | AG | 0.481 | G: 0.582 |       |       |       |         |
|                     | GG | 0.342 |          |       |       |       |         |
|                     | CC | 0.677 | C: 0.829 | 1.395 | 0.283 | 0.272 | 0.821   |
| scaffold17-796332   | CT | 0.304 | T: 0.171 |       |       |       |         |
|                     | TT | 0.019 |          |       |       |       |         |
|                     | CC | 0.411 | C: 0.665 | 1.805 | 0.446 | 0.459 | 2.908   |
| scaffold17-796939   | CT | 0.506 | T: 0.335 |       |       |       |         |
|                     | TT | 0.082 |          |       |       |       |         |
|                     | CC | 0.918 | C: 0.924 | 1.163 | 0.140 | 0.136 | 130.787 |
| scaffold18-2467783  | CT | 0.013 | T: 0.076 |       |       |       |         |
|                     | TT | 0.070 |          |       |       |       |         |
|                     | CC | 0.044 | C: 0.237 | 1.567 | 0.362 | 0.878 | 0.698   |
| scaffold184-113778  | CT | 0.386 | T: 0.763 |       |       |       |         |
|                     | TT | 0.570 |          |       |       |       |         |

|                     |    |       |          |       |       |       |        |
|---------------------|----|-------|----------|-------|-------|-------|--------|
| scaffold184-115262  | AA | 0.006 | A: 0.051 | 1.106 | 0.096 | 0.993 | 0.970  |
|                     | AG | 0.089 | G: 0.949 |       |       |       |        |
|                     | GG | 0.905 |          |       |       |       |        |
| scaffold19-709400   | CC | 0.810 | C: 0.905 | 1.221 | 0.181 | 0.166 | 1.738  |
|                     | CT | 0.190 | T: 0.095 |       |       |       |        |
| scaffold2-2815335   | GG | 0.766 | G: 0.880 | 1.268 | 0.212 | 0.204 | 0.933  |
|                     | TG | 0.228 | T: 0.120 |       |       |       |        |
|                     | TT | 0.006 |          |       |       |       |        |
| scaffold2-3426830   | CC | 0.981 | C: 0.991 | 1.019 | 0.019 | 0.019 | 0.015  |
|                     | CT | 0.019 | T: 0.009 |       |       |       |        |
| scaffold2-13687576  | AA | 0.013 | A: 0.120 | 1.268 | 0.212 | 0.963 | 0.046  |
|                     | AT | 0.215 | T: 0.880 |       |       |       |        |
|                     | TT | 0.772 |          |       |       |       |        |
| scaffold20-453978   | AA | 0.772 | A: 0.883 | 1.261 | 0.207 | 0.199 | 0.805  |
|                     | AG | 0.222 | G: 0.117 |       |       |       |        |
|                     | GG | 0.006 |          |       |       |       |        |
| scaffold21-4955509  | AA | 0.171 | A: 0.443 | 1.974 | 0.494 | 0.682 | 1.674  |
|                     | AG | 0.544 | G: 0.557 |       |       |       |        |
|                     | GG | 0.285 |          |       |       |       |        |
| scaffold210-68511   | AA | 0.006 | A: 0.136 | 1.307 | 0.235 | 0.954 | 1.698  |
|                     | AG | 0.259 | G: 0.864 |       |       |       |        |
|                     | GG | 0.734 |          |       |       |       |        |
| scaffold25-4206172  | AA | 0.209 | A: 0.335 | 1.805 | 0.446 | 0.788 | 3.472  |
|                     | AG | 0.380 | G: 0.665 |       |       |       |        |
|                     | GG | 0.475 |          |       |       |       |        |
| scaffold290-11890   | CC | 0.120 | C: 0.361 | 1.856 | 0.461 | 0.763 | 0.291  |
|                     | CT | 0.481 | T: 0.639 |       |       |       |        |
|                     | TT | 0.399 |          |       |       |       |        |
| scaffold3-16652593  | CC | 0.576 | C: 0.772 | 1.543 | 0.352 | 0.342 | 2.097  |
|                     | CT | 0.392 | T: 0.228 |       |       |       |        |
|                     | TT | 0.032 |          |       |       |       |        |
| scaffold3-16653046  | CT | 0.228 | C: 0.114 | 1.253 | 0.202 | 0.194 | 2.612  |
|                     | TT | 0.772 | T: 0.886 |       |       |       |        |
| scaffold305-32581   | AG | 0.044 | A: 0.022 | 1.045 | 0.043 | 0.043 | 0.081  |
|                     | GG | 0.956 | G: 0.978 |       |       |       |        |
|                     | CC | 0.633 | C: 0.801 | 1.469 | 0.319 | 0.308 | 0.407  |
| scaffold31-9275712  | CT | 0.335 | T: 0.199 |       |       |       |        |
|                     | TT | 0.032 |          |       |       |       |        |
| scaffold31-11182212 | AA | 0.006 | A: 0.054 | 1.128 | 0.114 | 0.992 | 0.719  |
|                     | AG | 0.095 | G: 0.940 |       |       |       |        |
|                     | GG | 0.892 |          |       |       |       |        |
| scaffold31-12525471 | AA | 0.032 | A: 0.114 | 1.253 | 0.202 | 0.967 | 5.403  |
|                     | AC | 0.165 | C: 0.886 |       |       |       |        |
|                     | CC | 0.804 |          |       |       |       |        |
| scaffold34-3226435  | AA | 0.051 | A: 0.225 | 1.535 | 0.348 | 0.889 | 0.0001 |
|                     | AC | 0.348 | C: 0.775 |       |       |       |        |
|                     | CC | 0.601 |          |       |       |       |        |
| scaffold35-2164468  | AA | 0.114 | A: 0.367 | 1.868 | 0.465 | 0.757 | 1.270  |

|                    |    |       |          |       |       |       |        |
|--------------------|----|-------|----------|-------|-------|-------|--------|
| scaffold36-4436178 | AG | 0.506 | G: 0.633 |       |       |       |        |
|                    | GG | 0.380 |          |       |       |       |        |
|                    | CC | 0.335 | C: 0.585 | 1.943 | 0.485 | 0.539 | 0.143  |
|                    | CT | 0.500 | T: 0.415 |       |       |       |        |
|                    | TT | 0.165 |          |       |       |       |        |
| scaffold4-10430350 | AA | 0.291 | A: 0.516 | 1.998 | 0.499 | 0.609 | 1.592  |
|                    | AG | 0.449 | G: 0.484 |       |       |       |        |
|                    | GG | 0.259 |          |       |       |       |        |
| scaffold435-12868  | AA | 0.044 | A: 0.234 | 1.559 | 0.359 | 0.881 | 0.545  |
|                    | AG | 0.380 | G: 0.766 |       |       |       |        |
|                    | GG | 0.576 |          |       |       |       |        |
| scaffold49-4261152 | AA | 0.753 | A: 0.829 | 1.395 | 0.283 | 0.272 | 34.010 |
|                    | AG | 0.152 | G: 0.171 |       |       |       |        |
|                    | GG | 0.095 |          |       |       |       |        |
| scaffold5-12042944 | CC | 0.797 | C: 0.899 | 1.223 | 0.182 | 0.176 | 2.006  |
|                    | CT | 0.203 | T: 0.101 |       |       |       |        |
| scaffold59-960994  | AA | 0.006 | A: 0.111 | 1.245 | 0.197 | 0.968 | 0.574  |
|                    | AG | 0.209 | G: 0.889 |       |       |       |        |
|                    | GG | 0.785 |          |       |       |       |        |
| scaffold6-5210078  | AA | 0.108 | A: 0.304 | 1.733 | 0.423 | 0.818 | 0.827  |
|                    | AC | 0.392 | C: 0.696 |       |       |       |        |
|                    | CC | 0.500 |          |       |       |       |        |
| scaffold6-9258715  | CC | 0.468 | C: 0.649 | 1.837 | 0.456 | 0.475 | 6.865  |
|                    | CT | 0.361 | T: 0.351 |       |       |       |        |
|                    | TT | 0.171 |          |       |       |       |        |
| scaffold6-15802194 | CC | 0.108 | C: 0.253 | 1.608 | 0.378 | 0.864 | 8.364  |
|                    | CT | 0.291 | T: 0.747 |       |       |       |        |
|                    | TT | 0.601 |          |       |       |       |        |
| scaffold65-275780  | AA | 0.019 | A: 0.206 | 1.485 | 0.327 | 0.904 | 3.220  |
|                    | AG | 0.373 | G: 0.794 |       |       |       |        |
|                    | GG | 0.608 |          |       |       |       |        |
| scaffold66-172323  | AA | 0.019 | A: 0.149 | 1.339 | 0.253 | 0.946 | 0.097  |
|                    | AG | 0.259 | G: 0.851 |       |       |       |        |
|                    | GG | 0.722 |          |       |       |       |        |
| scaffold69-513313  | CC | 0.203 | C: 0.405 | 1.930 | 0.482 | 0.720 | 4.023  |
|                    | CT | 0.405 | T: 0.595 |       |       |       |        |
|                    | TT | 0.392 |          |       |       |       |        |
| scaffold7-15455173 | AA | 0.070 | A: 0.225 | 1.558 | 0.358 | 0.890 | 1.857  |
|                    | AG | 0.310 | G: 0.769 |       |       |       |        |
|                    | GG | 0.614 |          |       |       |       |        |
| scaffold7-15455275 | CC | 0.152 | C: 0.430 | 1.962 | 0.490 | 0.695 | 2.920  |
|                    | CT | 0.557 | T: 0.570 |       |       |       |        |
|                    | TT | 0.291 |          |       |       |       |        |
| scaffold7-20336421 | CC | 0.468 | C: 0.690 | 1.748 | 0.428 | 0.433 | 0.198  |
|                    | CT | 0.443 | T: 0.310 |       |       |       |        |
|                    | TT | 0.089 |          |       |       |       |        |
| scaffold8-9389475  | CC | 0.614 | C: 0.753 | 1.592 | 0.372 | 0.364 | 9.956  |
|                    | CT | 0.278 | T: 0.247 |       |       |       |        |
|                    | TT | 0.108 |          |       |       |       |        |
| scaffold8-12482471 | CC | 0.886 | C: 0.940 | 1.127 | 0.113 | 0.110 | 0.364  |
|                    | CT | 0.108 | T: 0.060 |       |       |       |        |

|                    |    |       |          |       |       |       |        |
|--------------------|----|-------|----------|-------|-------|-------|--------|
| scaffold9-8466307  | TT | 0.006 |          |       |       |       |        |
|                    | CC | 0.557 | C: 0.753 | 1.592 | 0.372 | 0.364 | 0.485  |
|                    | CT | 0.392 | T: 0.247 |       |       |       |        |
|                    | TT | 0.051 |          |       |       |       |        |
| scaffold9-8467739  | AA | 0.468 | A: 0.677 | 1.777 | 0.437 | 0.446 | 0.313  |
|                    | AG | 0.418 | G: 0.323 |       |       |       |        |
|                    | GG | 0.114 |          |       |       |       |        |
| scaffold91-1266067 | AA | 0.127 | A: 0.174 | 1.404 | 0.288 | 0.928 | 70.884 |
|                    | AG | 0.095 | G: 0.826 |       |       |       |        |
|                    | GG | 0.778 |          |       |       |       |        |

---

Note:  $\chi^2$  value corresponds to  $P$  value  $P0.05(2) = 5.99$ ,  $P0.01(2) = 9.21$ .
